# Supplementary material for: Cu/SAPO-34 prepared by a facile ball milling method for enhanced catalytic performance in the selective catalytic reduction of NOx with NH3
Source: Royal Society of Chemistry journal article supplement (doi:10.1039/c9cp04519h), 2019-01-01
Supplement: c9cp04519h1.pdf [file c9cp04519h1.pdf]

## Electronic Supporting Information

### **Cu/SAPO-34 prepared by a facile ball milling method for enhanced catalytic performance in selective catalytic reduction of NO<sub>x</sub> with NH<sub>3</sub>**

*Huazhen Chang,<sup>a</sup> Xuan Qin,<sup>a</sup> Lei Ma,<sup>b</sup> Tao Zhang,<sup>a,\*</sup> Junhua Li<sup>c</sup>*

<sup>a</sup> School of Environment and Natural Resources, Renmin University of China, Beijing  
100872, China

<sup>b</sup> Department of Chemical Engineering, University of Michigan, Ann Arbor,  
Michigan 48109, United States

<sup>c</sup> School of Environment, Tsinghua University, Beijing 100084, China

\* Corresponding authors: E-mail address: zhangt@ruc.edu.cn

Tel.: +86 10 82502692, fax: +86 10 82502692

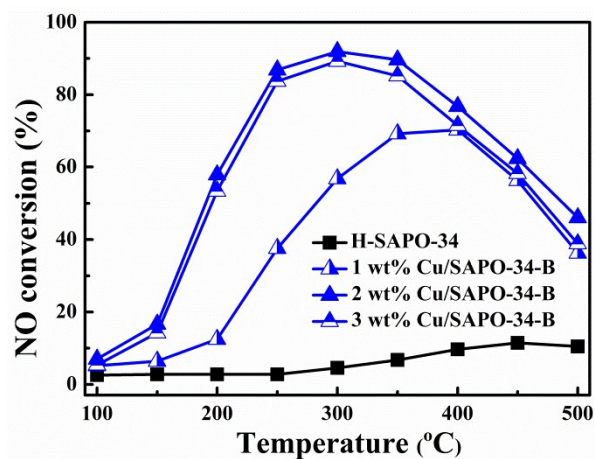

**Fig. S1.** NO conversion as a function of temperature over Cu/SAPO-34-B catalysts with different Cu loadings. Reaction conditions:  $[\text{NO}] = [\text{NH}_3] = 500$  ppm,  $[\text{O}_2] = 5\%$ ,  $\text{N}_2$  balance, total flow rate  $200 \text{ mL min}^{-1}$  and GHSV =  $200\,000 \text{ h}^{-1}$ .

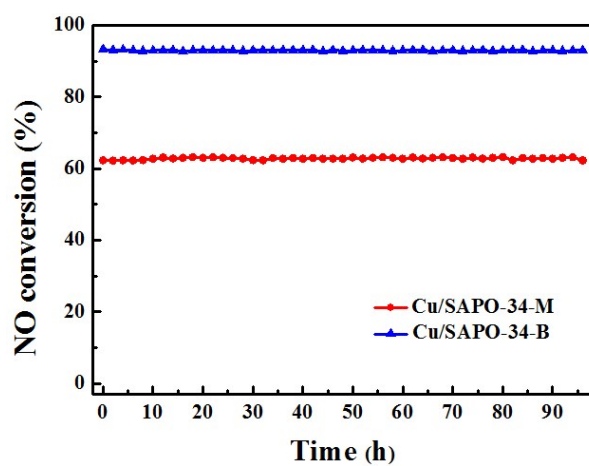

**Fig. S2.** NH<sub>3</sub>-SCR lifetime tests of Cu/SAPO-34-M and Cu/SAPO-34-B at 400 and 350 °C, respectively. Reaction conditions: [NO] = [NH<sub>3</sub>] = 500 ppm, [O<sub>2</sub>] = 5%, N<sub>2</sub> balance, total flow rate 200 mL min<sup>-1</sup> and GHSV = 200 000 h<sup>-1</sup>.

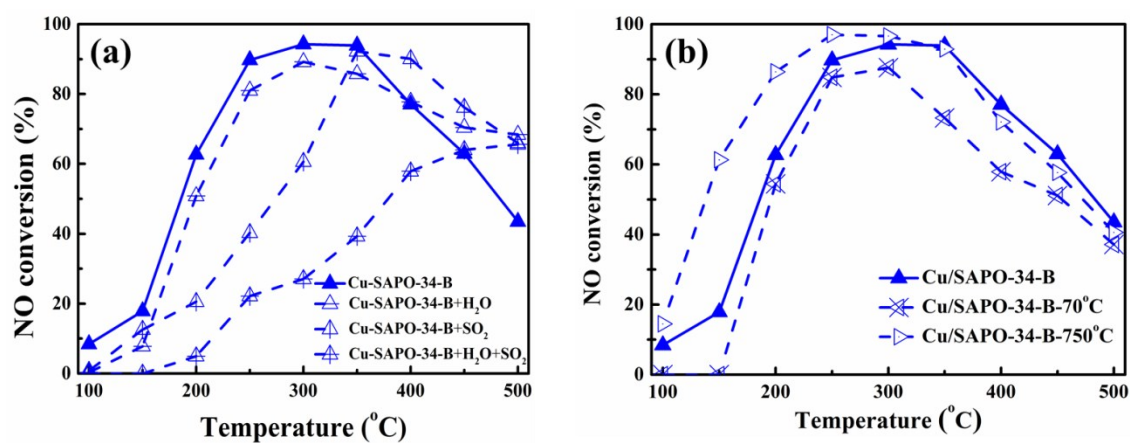

**Fig. S3.** (a) NO conversion as a function of temperature over Cu/SAPO-34-B catalyst in the presence of H<sub>2</sub>O and SO<sub>2</sub>. (b) NO conversion as a function of temperature over Cu/SAPO-34-B catalyst after hydrothermal treatments at high and low temperature. Reaction conditions: [NO] = [NH<sub>3</sub>] = 500 ppm, [O<sub>2</sub>] = 5%, [H<sub>2</sub>O] = 5% (when used), [SO<sub>2</sub>] = 100 ppm (when used), N<sub>2</sub> balance, total flow rate 200 mL min<sup>-1</sup> and GHSV = 200 000 h<sup>-1</sup>.

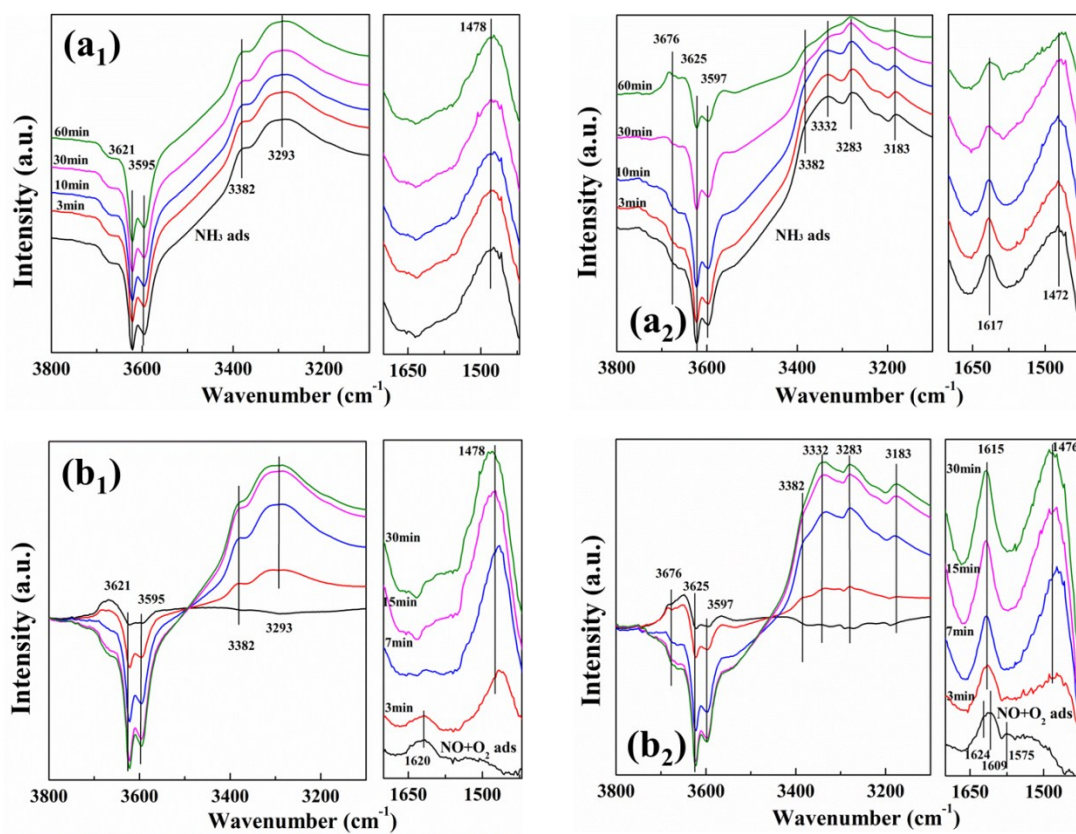

**Fig. S4.** Consumption of  $\text{NH}_4^+$  ions and coordinated  $\text{NH}_3$  at 150 °C upon passing  $\text{NO}+\text{O}_2$  over Cu/SAPO-34-M (a<sub>1</sub>) and Cu/SAPO-34-B (a<sub>2</sub>) with preadsorbed  $\text{NH}_3$ . Consumption of the adsorbed  $\text{NO}_x$  species at 150 °C upon passing  $\text{NH}_3$  over Cu/SAPO-34-M (b<sub>1</sub>) and Cu/SAPO-34-B (b<sub>2</sub>) with preadsorbed  $\text{NO}+\text{O}_2$ .

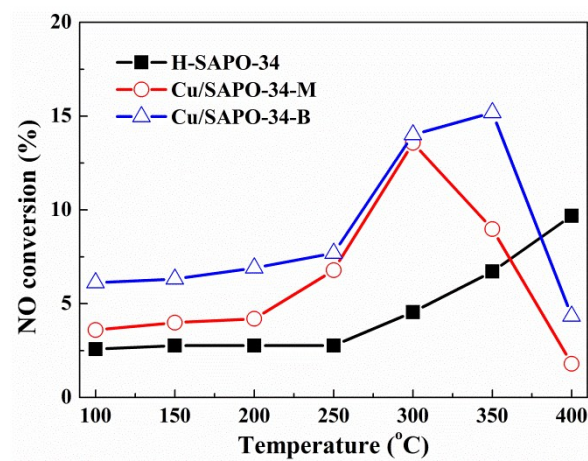

**Fig. S5.** NO conversion as a function of temperature over Cu/SAPO-34-M and Cu/SAPO-34-B samples before calcination. Reaction conditions:  $[\text{NO}] = [\text{NH}_3] = 500 \text{ ppm}$ ,  $[\text{O}_2] = 5\%$ ,  $\text{N}_2$  balance, total flow rate  $200 \text{ mL min}^{-1}$  and GHSV =  $200\,000 \text{ h}^{-1}$ .
